# Supplementary material
Source: publisher site journal article supplement (https://www.dovepress.com/article/572750)

**Appendix 1.** Detailed searched strategy on Medline database (via Pubmed).

("dynamic* predict*"[Title]) OR ( (“dynamic*”[Title]) AND ( ("predict* score*"[Title]) OR ("predict* tool*"[Title]) OR ("scoring system*"[Title]) OR ("prognostic tool*"[Title]) OR ("prognostic model*"[Title]) OR ("prognostic approach*"[Title]) ) )

**Appendix 2.** List of 171 retained articles for the systematic review of articles about dynamic predictions.

1. Akhondi-Asl A, Geva A, Burns JP, Mehta NM. Dynamic Prediction of Mortality Using Longitudinally Measured Pediatric Sequential Organ Failure Assessment Scores: A Joint Modeling Approach. Pediatr Crit Care Med. 2024;25(5):443-451. doi:10.1097/PCC.0000000000003457

2. Alvares D, Barrett JK, Mercier F, et al. A Bayesian Joint Model of Multiple Nonlinear Longitudinal and Competing Risks Outcomes for Dynamic Prediction in Multiple Myeloma: Joint Estimation and Corrected Two-Stage Approaches. Stat Med. 2025;44(3-4):e10322. doi:10.1002/sim.10322

3. Amroun K, Chaltiel R, Reyal F, et al. Dynamic Prediction of Resectability for Patients with Advanced Ovarian Cancer Undergoing Neo-Adjuvant Chemotherapy: Application of Joint Model for Longitudinal CA-125 Levels. Cancers (Basel). 2022;15(1). doi:10.3390/cancers15010231

4. Anand P, D’Andrea E, Feldman W, et al. A Dynamic Prognostic Model for Identifying Vulnerable COVID-19 Patients at High Risk of Rapid Deterioration. Pharmacoepidemiol Drug Saf. 2024;33(8):e5872. doi:10.1002/pds.5872

5. Andrinopoulou ER, Eilers PHC, Takkenberg JJM, Rizopoulos D. Improved dynamic predictions from joint models of longitudinal and survival data with time-varying effects using P-splines. Biometrics. 2018;74(2):685-693. doi:10.1111/biom.12814

6. Andrinopoulou ER, Harhay MO, Ratcliffe SJ, Rizopoulos D. Reflection on modern methods: Dynamic prediction using joint models of longitudinal and time-to-event data. Int J Epidemiol. 2021;50(5):1731-1743. doi:10.1093/ije/dyab047

7. Andrinopoulou ER, Rizopoulos D, Takkenberg JJ, Lesaffre E. Combined dynamic predictions using joint models of two longitudinal outcomes and competing risk data. Stat Methods Med Res. 2017;26(4):1787-1801. doi:10.1177/0962280215588340

8. Andrinopoulou ER, Rizopoulos D, Geleijnse ML, Lesaffre E, Bogers AJJC, Takkenberg JJM. Dynamic prediction of outcome for patients with severe aortic stenosis: application of joint models for longitudinal and time-to-event data. BMC Cardiovasc Disord. 2015;15:28. doi:10.1186/s12872-015-0035-z

9. Asar Ö, Fournier MC, Dantan E. Dynamic predictions of kidney graft survival in the presence of longitudinal outliers. Stat Methods Med Res. 2021;30(1):185-203. doi:10.1177/0962280220945352

10. Asgari S, Khalili D, Zayeri F, Azizi F, Hadaegh F. Dynamic prediction models improved the risk classification of type 2 diabetes compared with classical static models. J Clin Epidemiol. 2021;140:33-43. doi:10.1016/j.jclinepi.2021.08.026

11. Bah CS, Mbambara B, Xie X, et al. Practical prognostic tools to predict the risk of postoperative delirium in older patients undergoing cardiac surgery: visual and dynamic nomograms. J Clin Monit Comput. 2025;39(1):11-24. doi:10.1007/s10877-024-01219-1

12. Bakar KS, Teixeira-Pinto A, Gately R, Boroumand F, Lim WH, Wong G. Dynamic prediction of kidney allograft and patient survival using post-transplant estimated glomerular filtration rate trajectory. Clin Kidney J. 2024;17(11):sfae314. doi:10.1093/ckj/sfae314

13. Barrett J, Su L. Dynamic predictions using flexible joint models of longitudinal and time-to-event data. Stat Med. 2017;36(9):1447-1460. doi:10.1002/sim.7209

14. Ben-Hassen C, Helmer C, Berr C, Jacqmin-Gadda H. Five-Year Dynamic Prediction of Dementia Using Repeated Measures of Cognitive Tests and a Dependency Scale. Am J Epidemiol. 2022;191(3):453-464. doi:10.1093/aje/kwab269

15. Blanche P, Proust-Lima C, Loubère L, Berr C, Dartigues JF, Jacqmin-Gadda H. Quantifying and comparing dynamic predictive accuracy of joint models for longitudinal marker and time-to-event in presence of censoring and competing risks. Biometrics. 2015;71(1):102-113. doi:10.1111/biom.12232

16. Bone C, Simmonds-Buckley M, Thwaites R, et al. Dynamic prediction of psychological treatment outcomes: development and validation of a prediction model using routinely collected symptom data. Lancet Digit Health. 2021;3(4):e231-e240. doi:10.1016/S2589-7500(21)00018-2

17. Brown SL, St Amand MD, Zamble E. The dynamic prediction of criminal recidivism: a three-wave prospective study. Law Hum Behav. 2009;33(1):25-45. doi:10.1007/s10979-008-9139-7

18. Campbell KR, Martins R, Davis S, Juarez-Colunga E. Dynamic prediction based on variability of a longitudinal biomarker. BMC Med Res Methodol. 2021;21(1):104. doi:10.1186/s12874-021-01294-x

19. Cao Y, Jiang Y, Lin X, et al. Dynamic Prediction of Outcome for Patients With Ovarian Cancer: Application of a Joint Model for Longitudinal Cancer Antigen 125 Values. Int J Gynecol Cancer. 2018;28(1):85-91. doi:10.1097/IGC.0000000000001134

20. Chae D, Kim SY, Song Y, et al. Dynamic predictive model for postoperative nausea and vomiting for intravenous fentanyl patient-controlled analgesia. Anaesthesia. 2020;75(2):218-226. doi:10.1111/anae.14849

21. Chen G, Chen Y, Shi Y, Mao Z, Lou J, Ma J. A dynamic prediction model for preeclampsia using the sFlt-1/PLGF ratio combined with multiple factors. BMC Pregnancy Childbirth. 2024;24(1):443. doi:10.1186/s12884-024-06627-4

22. Chen S, He Y, Liu J, Wu R, Wang M, Jin A. Dynamic Survival Risk Prognostic Model and Genomic Landscape for Atypical Teratoid/Rhabdoid Tumors: A Population-Based, Real-World Study. Cancers (Basel). 2024;16(5). doi:10.3390/cancers16051059

23. Chen T, Chen T, Xu W, et al. Development and External Validation of a Multidimensional Deep Learning Model to Dynamically Predict Kidney Outcomes in IgA Nephropathy. Clin J Am Soc Nephrol. 2024;19(7):898-907. doi:10.2215/CJN.0000000000000471

24. Chen Y, Wang Y, Chen J, et al. Multidimensional dynamic prediction model for hospitalized patients with the omicron variant in China. Infect Dis Model. 2023;8(4):1097-1107. doi:10.1016/j.idm.2023.09.003

25. Cui J, Chen D, Zhang J, et al. Landmark Model-based Individual Dynamic Prediction of Conversion from Mild Cognitive Impairment to Alzheimer’s Disease using Cognitive Screening. Curr Alzheimer Res. 2023;20(2):89-97. doi:10.2174/1567205020666230526101524

26. Cupido AJ, Hof MH, de Boer LM, et al. Adherence to statin treatment in patients with familial hypercholesterolemia: A dynamic prediction model. J Clin Lipidol. 2023;17(2):236-243. doi:10.1016/j.jacl.2022.12.004

27. Dantan E, Pailler M, Ragot S, et al. Renal function decline and heart failure hospitalisation in patients with type 2 diabetes: Dynamic predictions from the prospective SURDIAGENE cohort. Diabetes Res Clin Pract. 2022;194:110152. doi:10.1016/j.diabres.2022.110152

28. Davies AL, Coolen AC, Galla T. Delayed kernels for longitudinal survival analysis and dynamic prediction. Stat Methods Med Res. 2024;33(10):1836-1858. doi:10.1177/09622802241275382

29. de Vos II, Nieboer D, Frydenberg M, et al. Personalized Dynamic Prediction Model for Biopsy Timing in Patients With Prostate Cancer During Active Surveillance. JAMA Netw Open. 2025;8(1):e2454366. doi:10.1001/jamanetworkopen.2024.54366

30. Desmée S, Mentré F, Veyrat-Follet C, Sébastien B, Guedj J. Nonlinear joint models for individual dynamic prediction of risk of death using Hamiltonian Monte Carlo: application to metastatic prostate cancer. BMC Med Res Methodol. 2017;17(1):105. doi:10.1186/s12874-017-0382-9

31. Devaux A, Genuer R, Peres K, Proust-Lima C. Individual dynamic prediction of clinical endpoint from large dimensional longitudinal biomarker history: a landmark approach. BMC Med Res Methodol. 2022;22(1):188. doi:10.1186/s12874-022-01660-3

32. Du K, Li L, Wang Q, et al. Development and application of a dynamic prediction model for esophageal cancer. Ann Transl Med. 2021;9(20):1546. doi:10.21037/atm-21-4964

33. Emura T, Nakatochi M, Matsui S, Michimae H, Rondeau V. Personalized dynamic prediction of death according to tumour progression and high-dimensional genetic factors: Meta-analysis with a joint model. Stat Methods Med Res. 2018;27(9):2842-2858. doi:10.1177/0962280216688032

34. Erdfelder F, Grigutsch D, Hoeft A, Reider E, Matot I, Zenker S. Dynamic prediction of the need for renal replacement therapy in intensive care unit patients using a simple and robust model. J Clin Monit Comput. 2017;31(1):195-204. doi:10.1007/s10877-015-9814-4

35. Fahimi F, Guo Y, Tong SC, et al. A Vital Signs Telemonitoring Programme Improves the Dynamic Prediction of Readmission Risk in Patients with Heart Failure. AMIA Annu Symp Proc. 2020;2020:432-441.

36. Fan W, Liao W, Jiang S, Chen Y, Li C, Liang X. Development of novel prognostic models based on dynamic changes in risk factors for hepatitis B associated acute-on-chronic liver failure:a 10-year retrospective study. Heliyon. 2024;10(7):e29276. doi:10.1016/j.heliyon.2024.e29276

37. Fang Z, Zou D, Xiong W, et al. Dynamic prediction of hypoxemia risk at different time points based on preoperative and intraoperative features: machine learning applications in outpatients undergoing esophagogastroduodenoscopy. Ann Med. 2023;55(1):1156-1167. doi:10.1080/07853890.2023.2187878

38. Feng X, Pan S, Yan M, et al. Dynamic prediction of late noninvasive ventilation failure in intensive care unit using a time adaptive machine model. Comput Methods Programs Biomed. 2021;208:106290. doi:10.1016/j.cmpb.2021.106290

39. Fontein DBY, Klinten Grand M, Nortier JWR, et al. Dynamic prediction in breast cancer: proving feasibility in clinical practice using the TEAM trial. Ann Oncol. 2015;26(6):1254-1262. doi:10.1093/annonc/mdv146

40. Fournier MC, Dantan E, Blanche P. An R(2) -curve for evaluating the accuracy of dynamic predictions. Stat Med. 2018;37(7):1125-1133. doi:10.1002/sim.7571

41. Fournier MC, Foucher Y, Blanche P, et al. Dynamic predictions of long-term kidney graft failure: an information tool promoting patient-centred care. Nephrol Dial Transplant. 2019;34(11):1961-1969. doi:10.1093/ndt/gfz027

42. Fries AH, Choi E, Han SS. Penalized landmark supermodels (penLM) for dynamic prediction for time-to-event outcomes in high-dimensional data. BMC Med Res Methodol. 2025;25(1):22. doi:10.1186/s12874-024-02418-9

43. Fustolo-Gunnink SF, Fijnvandraat K, Putter H, et al. Dynamic prediction of bleeding risk in thrombocytopenic preterm neonates. Haematologica. 2019;104(11):2300-2306. doi:10.3324/haematol.2018.208595

44. Glazar DJ, Sahebjam S, Yu HHM, Chen DT, Bhandari M, Enderling H. A sample size analysis of a mathematical model of longitudinal tumor volume and progression-free survival for Bayesian individual dynamic predictions in recurrent high-grade glioma. CPT Pharmacometrics Syst Pharmacol. 2025;14(3):495-509. doi:10.1002/psp4.13290

45. Gomon D, Putter H, Fiocco M, Signorelli M. Dynamic prediction of survival using multivariate functional principal component analysis: A strict landmarking approach. Stat Methods Med Res. 2024;33(2):256-272. doi:10.1177/09622802231224631

46. Grand MK, de Witte TJM, Putter H. Dynamic prediction of cumulative incidence functions by direct binomial regression. Biom J. 2018;60(4):734-747. doi:10.1002/bimj.201700194

47. Grand MK, Vermeer KA, Missotten T, Putter H. A joint model for dynamic prediction in uveitis. Stat Med. 2019;38(10):1802-1816. doi:10.1002/sim.8069

48. Guo C, Tian M, Gong M, et al. Development and Validation of a Dynamic Prediction Model for Massive Hemorrhage in Trauma. Emerg Med Int. 2022;2022:9438159. doi:10.1155/2022/9438159

49. Hamoen M, Vergouwe Y, Wijga AH, et al. Dynamic prediction of childhood high blood pressure in a population-based birth cohort: a model development study. BMJ Open. 2018;8(11):e023912. doi:10.1136/bmjopen-2018-023912

50. Heazell AEP, Graham N, Parkes MJ, Wilkinson J. Dynamic prediction of pregnancy outcome after previous stillbirth or perinatal death: pilot study to establish proof-of-concept and explore method feasibility. Ultrasound Obstet Gynecol. 2024;64(5):613-619. doi:10.1002/uog.29104

51. Hong Y, Su L, Song S, Yan F. Dynamic prediction of disease processes based on recurrent history and functional principal component analysis of longitudinal biomarkers: Application for ovarian epithelial cancer. Stat Med. 2021;40(8):2006-2023. doi:10.1002/sim.8885

52. Hu J, Kang XH, Xu FF, Huang KZ, Du B, Weng L. Dynamic prediction of life-threatening events for patients in intensive care unit. BMC Med Inform Decis Mak. 2022;22(1):276. doi:10.1186/s12911-022-02026-x

53. Hu Y, Yang T, Zhang J, et al. Dynamic Prediction of Mechanical Thrombectomy Outcome for Acute Ischemic Stroke Patients Using Machine Learning. Brain Sci. 2022;12(7). doi:10.3390/brainsci12070938

54. Huang A, Chen Q, Fei Y, et al. Dynamic prediction of relapse in patients with acute leukemias after allogeneic transplantation: Joint model for minimal residual disease. Int J Lab Hematol. 2021;43(1):84-92. doi:10.1111/ijlh.13328

55. Huang B, Huang M, Zhang C, et al. Individual dynamic prediction and prognostic analysis for long-term allograft survival after kidney transplantation. BMC Nephrol. 2022;23(1):359. doi:10.1186/s12882-022-02996-0

56. Huang X, Yan F, Ning J, Feng Z, Choi S, Cortes J. A two-stage approach for dynamic prediction of time-to-event distributions. Stat Med. 2016;35(13):2167-2182. doi:10.1002/sim.6860

57. Hurst TE, Xanthopoulos A, Ehrlinger J, et al. Dynamic prediction of left ventricular assist device pump thrombosis based on lactate dehydrogenase trends. ESC Heart Fail. 2019;6(5):1005-1014. doi:10.1002/ehf2.12473

58. Inman BA, Frank I, Boorjian SA, et al. Dynamic prediction of metastases after radical prostatectomy for prostate cancer. BJU Int. 2011;108(11):1762-1768. doi:10.1111/j.1464-410X.2011.10208.x

59. Jarrett D, Yoon J, van der Schaar M. Dynamic Prediction in Clinical Survival Analysis Using Temporal Convolutional Networks. IEEE J Biomed Health Inform. 2020;24(2):424-436. doi:10.1109/JBHI.2019.2929264

60. Jiang W, Siddiqui S, Barnes S, et al. Readmission Risk Trajectories for Patients With Heart Failure Using a Dynamic Prediction Approach: Retrospective Study. JMIR Med Inform. 2019;7(4):e14756. doi:10.2196/14756

61. Jiang W, Teng J, Xu J, et al. Dynamic Predictive Scores for Cardiac Surgery-Associated Acute Kidney Injury. J Am Heart Assoc. 2016;5(8). doi:10.1161/JAHA.116.003754

62. Jin Y, Li W, Wu Y, et al. Online interpretable dynamic prediction models for clinically significant posthepatectomy liver failure based on machine learning algorithms: a retrospective cohort study. Int J Surg. 2024;110(11):7047-7057. doi:10.1097/JS9.0000000000001764

63. Kaboré R, Ferrer L, Couchoud C, et al. Dynamic prediction models for graft failure in paediatric kidney transplantation. Nephrol Dial Transplant. 2021;36(5):927-935. doi:10.1093/ndt/gfaa180

64. Keogh RH, Seaman SR, Barrett JK, Taylor-Robinson D, Szczesniak R. Dynamic Prediction of Survival in Cystic Fibrosis: A Landmarking Analysis Using UK Patient Registry Data. Epidemiology. 2019;30(1):29-37. doi:10.1097/EDE.0000000000000920

65. Kheirandish M, Catanzaro D, Crudu V, Zhang S. Integrating landmark modeling framework and machine learning algorithms for dynamic prediction of tuberculosis treatment outcomes. J Am Med Inform Assoc. 2022;29(5):900-908. doi:10.1093/jamia/ocac003

66. Klug J, Leclerc G, Dirren E, Carrera E. Machine learning for early dynamic prediction of functional outcome after stroke. Commun Med (Lond). 2024;4(1):232. doi:10.1038/s43856-024-00666-w

67. Kolk MZH, Ruipérez-Campillo S, Alvarez-Florez L, et al. Dynamic prediction of malignant ventricular arrhythmias using neural networks in patients with an implantable cardioverter-defibrillator. EBioMedicine. 2024;99:104937. doi:10.1016/j.ebiom.2023.104937

68. Konerman MA, Brown M, Zheng Y, Lok ASF. Dynamic prediction of risk of liver-related outcomes in chronic hepatitis C using routinely collected data. J Viral Hepat. 2016;23(6):455-463. doi:10.1111/jvh.12509

69. Król A, Tournigand C, Michiels S, Rondeau V. Multivariate joint frailty model for the analysis of nonlinear tumor kinetics and dynamic predictions of death. Stat Med. 2018;37(13):2148-2161. doi:10.1002/sim.7640

70. Lajevardi-Khosh A, Jalali A, Rajput KS, Selvaraj N. Novel Dynamic Prediction of Daily Patient Discharge in Acute and Critical Care. Annu Int Conf IEEE Eng Med Biol Soc. 2021;2021:2347-2352. doi:10.1109/EMBC46164.2021.9630453

71. Li K, Furr-Stimming E, Paulsen JS, Luo S. Dynamic Prediction of Motor Diagnosis in Huntington’s Disease Using a Joint Modeling Approach. J Huntingtons Dis. 2017;6(2):127-137. doi:10.3233/JHD-170236

72. Li K, Luo S. Dynamic predictions in Bayesian functional joint models for longitudinal and time-to-event data: An application to Alzheimer’s disease. Stat Methods Med Res. 2019;28(2):327-342. doi:10.1177/0962280217722177

73. Li K, Luo S. Dynamic prediction of Alzheimer’s disease progression using features of multiple longitudinal outcomes and time-to-event data. Stat Med. 2019;38(24):4804-4818. doi:10.1002/sim.8334

74. Li L, Luo S, Hu B, Greene T. Dynamic Prediction of Renal Failure Using Longitudinal Biomarkers in a Cohort Study of Chronic Kidney Disease. Stat Biosci. 2017;9(2):357-378. doi:10.1007/s12561-016-9183-7

75. Li N, Liu Y, Li S, Elashoff RM, Li G. A flexible joint model for multiple longitudinal biomarkers and a time-to-event outcome: With applications to dynamic prediction using highly correlated biomarkers. Biom J. 2021;63(8):1575-1586. doi:10.1002/bimj.202000085

76. Li R, Wang J, Zhang C, et al. Improved mortality prediction for pediatric acute liver failure using dynamic prediction strategy. J Pediatr Gastroenterol Nutr. 2024;78(2):320-327. doi:10.1002/jpn3.12094

77. Li W, Li L, Astor BC. A comparison of two approaches to dynamic prediction: Joint modeling and landmark modeling. Stat Med. 2023;42(13):2101-2115. doi:10.1002/sim.9713

78. Liang M, Li Z, Li L, Chinchilli VM, Zhang L, Wang M. Tackling dynamic prediction of death in patients with recurrent cardiovascular events. Stat Med. 2023;42(19):3487-3507. doi:10.1002/sim.9815

79. Lin J, Li K, Luo S. Functional survival forests for multivariate longitudinal outcomes: Dynamic prediction of Alzheimer’s disease progression. Stat Methods Med Res. 2021;30(1):99-111. doi:10.1177/0962280220941532

80. Lin J, Luo S. Deep learning for the dynamic prediction of multivariate longitudinal and survival data. Stat Med. 2022;41(15):2894-2907. doi:10.1002/sim.9392

81. Lin JL, Lin JX, Li P, et al. Dynamic prediction of long-term survival in patients with primary gastric diffuse large B-cell lymphoma: a SEER population-based study. BMC Cancer. 2019;19(1):873. doi:10.1186/s12885-019-5993-6

82. Lin KJ, D’Andrea E, Desai RJ, Gagne JJ, Liu J, Wang SV. Prospective validation of a dynamic prognostic model for identifying COVID-19 patients at high risk of rapid deterioration. Pharmacoepidemiol Drug Saf. 2023;32(5):545-557. doi:10.1002/pds.5580

83. Lin X, Li R, Yan F, Lu T, Huang X. Quantile residual lifetime regression with functional principal component analysis of longitudinal data for dynamic prediction. Stat Methods Med Res. 2019;28(4):1216-1229. doi:10.1177/0962280217753466

84. Lin X, Lu T, Yan F, Li R, Huang X. Mean residual life regression with functional principal component analysis on longitudinal data for dynamic prediction. Biometrics. 2018;74(4):1482-1491. doi:10.1111/biom.12876

85. Lin Z, Lin H, Lin C. Dynamic prediction of cancer-specific survival for primary hypopharyngeal squamous cell carcinoma. Int J Clin Oncol. 2020;25(7):1260-1269. doi:10.1007/s10147-020-01671-4

86. Liu B, Li K, Ma R, Zhang Q. Two web-based dynamic prediction models for the diagnosis and prognosis of gastric cancer with bone metastases: evidence from the SEER database. Front Endocrinol (Lausanne). 2023;14:1136089. doi:10.3389/fendo.2023.1136089

87. Liu C, Rueten-Budde AJ, Ranft A, Dirksen U, Gelderblom H, Fiocco M. Dynamic prediction of overall survival: a retrospective analysis on 979 patients with Ewing sarcoma from the German registry. BMJ Open. 2020;10(10):e036376. doi:10.1136/bmjopen-2019-036376

88. Liu R, Cai Y, Cai H, et al. Dynamic prediction for clinically relevant pancreatic fistula: a novel prediction model for laparoscopic pancreaticoduodenectomy. BMC Surg. 2021;21(1):7. doi:10.1186/s12893-020-00968-5

89. Lorimer B, Delgadillo J, Kellett S, Lawrence J. Dynamic prediction and identification of cases at risk of relapse following completion of low-intensity cognitive behavioural therapy. Psychother Res. 2021;31(1):19-32. doi:10.1080/10503307.2020.1733127

90. Luo Y, Payne SJ. Neurological intervention transition model for dynamic prediction of good outcome in spontaneous subarachnoid haemorrhage. Sci Rep. 2024;14(1):1584. doi:10.1038/s41598-024-51684-6

91. Ma H, Ma L, Yang L, et al. Construction and evaluation of a prognostic model for cervical cancer based on dynamic hematological and clinical features. BMC Cancer. 2025;25(1):207. doi:10.1186/s12885-025-13595-1

92. Ma X, Huang L, Yu M, et al. Dynamic Prediction of the Risk of Hepatocellular Carcinoma After DAA Treatment for Hepatitis C Patients. Cancer Control. 2025;32:10732748251316609. doi:10.1177/10732748251316609

93. Mauguen A, Rachet B, Mathoulin-Pélissier S, MacGrogan G, Laurent A, Rondeau V. Dynamic prediction of risk of death using history of cancer recurrences in joint frailty models. Stat Med. 2013;32(30):5366-5380. doi:10.1002/sim.5980

94. Moreau C, Riou J, Roux M. Predictive abilities comparison from multiple dynamic prediction models. Stat Methods Med Res. 2023;32(9):1811-1822. doi:10.1177/09622802231188521

95. Musoro JZ, Struijk GH, Geskus RB, Ten Berge I, Zwinderman AH. Dynamic prediction of recurrent events data by landmarking with application to a follow-up study of patients after kidney transplant. Stat Methods Med Res. 2018;27(3):832-845. doi:10.1177/0962280216643563

96. Nguyen H, Vasconcellos HD, Keck K, et al. Utility of multimodal longitudinal imaging data for dynamic prediction of cardiovascular and renal disease: the CARDIA study. Front Radiol. 2024;4:1269023. doi:10.3389/fradi.2024.1269023

97. Nicolaie MA, van Houwelingen JC, de Witte TM, Putter H. Dynamic prediction by landmarking in competing risks. Stat Med. 2013;32(12):2031-2047. doi:10.1002/sim.5665

98. Nihtyanova SI, Schreiber BE, Ong VH, Wells AU, Coghlan JG, Denton CP. Dynamic Prediction of Pulmonary Hypertension in Systemic Sclerosis Using Landmark Analysis. Arthritis Rheumatol. 2023;75(3):449-458. doi:10.1002/art.42349

99. Okura K, Fukuyama K, Seo S, et al. Personalized prognostic model for colorectal cancer in the era of precision medicine: a dynamic approach based on real-world data. Int J Clin Oncol. Published online May 1, 2025. doi:10.1007/s10147-025-02766-6

100. Ötleş E, Seymour J, Wang H, Denton BT. Dynamic prediction of work status for workers with occupational injuries: assessing the value of longitudinal observations. J Am Med Inform Assoc. 2022;29(11):1931-1940. doi:10.1093/jamia/ocac130

101. Papageorgiou G, Mokhles MM, Takkenberg JJM, Rizopoulos D. Individualized dynamic prediction of survival with the presence of intermediate events. Stat Med. 2019;38(30):5623-5640. doi:10.1002/sim.8387

102. Parr H, Porta N, Tree AC, Dearnaley D, Hall E. A Personalized Clinical Dynamic Prediction Model to Characterize Prognosis for Patients With Localized Prostate Cancer: Analysis of the CHHiP Phase 3 Trial. Int J Radiat Oncol Biol Phys. 2023;116(5):1055-1068. doi:10.1016/j.ijrobp.2023.02.022

103. Peng J, Tong L, Liang R, Yan H, Jiang X, Dai Y. PANoptosis-Related Optimal Model (PROM): A Novel Prognostic Tool Unveiling Immune Dynamics in Lung Adenocarcinoma. Int J Genomics. 2025;2025:5595391. doi:10.1155/ijog/5595391

104. Perez-Alday EA, Bender A, German D, et al. Dynamic predictive accuracy of electrocardiographic biomarkers of sudden cardiac death within a survival framework: the Atherosclerosis Risk in Communities (ARIC) study. BMC Cardiovasc Disord. 2019;19(1):255. doi:10.1186/s12872-019-1234-9

105. Pickett KL, Suresh K, Campbell KR, Davis S, Juarez-Colunga E. Random survival forests for dynamic predictions of a time-to-event outcome using a longitudinal biomarker. BMC Med Res Methodol. 2021;21(1):216. doi:10.1186/s12874-021-01375-x

106. Placido D, Thorsen-Meyer HC, Kaas-Hansen BS, Reguant R, Brunak S. Development of a dynamic prediction model for unplanned ICU admission and mortality in hospitalized patients. PLOS Digit Health. 2023;2(6):e0000116. doi:10.1371/journal.pdig.0000116

107. Pollack J, Yang W, Schnellinger EM, Arnaoutakis GJ, Kallan MJ, Kimmel SE. Dynamic prediction modeling of postoperative mortality among patients undergoing surgical aortic valve replacement in a statewide cohort over a 12-year period. JTCVS Open. 2023;15:94-112. doi:10.1016/j.xjon.2023.07.011

108. Proust-Lima C, Taylor JMG. Development and validation of a dynamic prognostic tool for prostate cancer recurrence using repeated measures of posttreatment PSA: a joint modeling approach. Biostatistics. 2009;10(3):535-549. doi:10.1093/biostatistics/kxp009

109. Raj R, Wennervirta JM, Tjerkaski J, et al. Dynamic prediction of mortality after traumatic brain injury using a machine learning algorithm. NPJ Digit Med. 2022;5(1):96. doi:10.1038/s41746-022-00652-3

110. Ranucci M, Di Dedda U, Cotza M, Zamalloa Moreano K. The multifactorial dynamic perfusion index: A predictive tool of cardiac surgery associated acute kidney injury. Perfusion. 2024;39(1):201-209. doi:10.1177/02676591221137033

111. Raynaud M, Aubert O, Divard G, et al. Dynamic prediction of renal survival among deeply phenotyped kidney transplant recipients using artificial intelligence: an observational, international, multicohort study. Lancet Digit Health. 2021;3(12):e795-e805. doi:10.1016/S2589-7500(21)00209-0

112. Reddavid R, Elmore U, Moro J, et al. Dynamic Prediction of Rectal Cancer Relapse and Mortality Using a Landmarking-Based Machine Learning Model: A Multicenter Retrospective Study from the Italian Society of Surgical Oncology-Colorectal Cancer Network Collaborative Group. Cancers (Basel). 2025;17(8). doi:10.3390/cancers17081294

113. Ren X, Wang J, Luo S. Dynamic prediction using joint models of longitudinal and recurrent event data: A Bayesian perspective. Biostat Epidemiol. 2021;5(2):250-266. doi:10.1080/24709360.2019.1693198

114. Rizopoulos D. Dynamic predictions and prospective accuracy in joint models for longitudinal and time-to-event data. Biometrics. 2011;67(3):819-829. doi:10.1111/j.1541-0420.2010.01546.x

115. Rizopoulos D, Molenberghs G, Lesaffre EMEH. Dynamic predictions with time-dependent covariates in survival analysis using joint modeling and landmarking. Biom J. 2017;59(6):1261-1276. doi:10.1002/bimj.201600238

116. Rizopoulos D, Taylor JMG. Optimizing dynamic predictions from joint models using super learning. Stat Med. 2024;43(7):1315-1328. doi:10.1002/sim.10010

117. Rondeau V, Mauguen A, Laurent A, Berr C, Helmer C. Dynamic prediction models for clustered and interval-censored outcomes: Investigating the intra-couple correlation in the risk of dementia. Stat Methods Med Res. 2017;26(5):2168-2183. doi:10.1177/0962280215594835

118. Rueten-Budde AJ, van Praag VM, van de Sande MAJ, Fiocco M. Dynamic prediction of overall survival for patients with high-grade extremity soft tissue sarcoma. Surg Oncol. 2018;27(4):695-701. doi:10.1016/j.suronc.2018.09.003

119. Rueten-Budde AJ, van Praag VM, van de Sande MAJ, Fiocco M. External validation and adaptation of a dynamic prediction model for patients with high-grade extremity soft tissue sarcoma. J Surg Oncol. 2021;123(4):1050-1056. doi:10.1002/jso.26337

120. Saluja V, Sharma A, Pasupuleti SS, Mitra LG, Kumar G, Agarwal PM. Comparison of Prognostic Models in Acute Liver Failure: Decision is to be Dynamic. Indian J Crit Care Med. 2019;23(12):574-581. doi:10.5005/jp-journals-10071-23294

121. Sayadi M, Zare N, Attar A, Ayatollahi SMT. Improved Landmark Dynamic Prediction Model to Assess Cardiovascular Disease Risk in On-Treatment Blood Pressure Patients: A Simulation Study and Post Hoc Analysis on SPRINT Data. Biomed Res Int. 2020;2020:2905167. doi:10.1155/2020/2905167

122. Schumacher M, Hieke S, Ihorst G, Engelhardt M. Dynamic prediction: A challenge for biostatisticians, but greatly needed by patients, physicians and the public. Biom J. 2020;62(3):822-835. doi:10.1002/bimj.201800248

123. Sène M, Taylor JM, Dignam JJ, Jacqmin-Gadda H, Proust-Lima C. Individualized dynamic prediction of prostate cancer recurrence with and without the initiation of a second treatment: Development and validation. Stat Methods Med Res. 2016;25(6):2972-2991. doi:10.1177/0962280214535763

124. Shen F, Li L. Backward joint model and dynamic prediction of survival with multivariate longitudinal data. Stat Med. 2021;40(20):4395-4409. doi:10.1002/sim.9037

125. Shi H, Jiang S, Cao J. Dynamic prediction with time-dependent marker in survival analysis using supervised functional principal component analysis. Stat Med. 2022;41(18):3547-3560. doi:10.1002/sim.9433

126. Shickel B, Loftus TJ, Ruppert M, et al. Dynamic predictions of postoperative complications from explainable, uncertainty-aware, and multi-task deep neural networks. Sci Rep. 2023;13(1):1224. doi:10.1038/s41598-023-27418-5

127. Spolverato G, Azzolina D, Paro A, et al. Dynamic Prediction of Survival after Curative Resection of Gastric Adenocarcinoma: A landmarking-based analysis. Eur J Surg Oncol. 2022;48(5):1025-1032. doi:10.1016/j.ejso.2021.11.127

128. Spreafico M, Hazewinkel AD, Gelderblom H, Fiocco M. Dynamic Prediction of Overall Survival for Patients with Osteosarcoma: A Retrospective Analysis of the EURAMOS-1 Clinical Trial Data. Curr Oncol. 2024;31(7):3630-3642. doi:10.3390/curroncol31070267

129. Suresh K, Taylor JMG, Spratt DE, Daignault S, Tsodikov A. Comparison of joint modeling and landmarking for dynamic prediction under an illness-death model. Biom J. 2017;59(6):1277-1300. doi:10.1002/bimj.201600235

130. Suresh K, Taylor JMG, Tsodikov A. A Gaussian copula approach for dynamic prediction of survival with a longitudinal biomarker. Biostatistics. 2021;22(3):504-521. doi:10.1093/biostatistics/kxz049

131. Suresh K, Taylor JMG, Tsodikov A. A copula-based approach for dynamic prediction of survival with a binary time-dependent covariate. Stat Med. 2021;40(23):4931-4946. doi:10.1002/sim.9102

132. Teramukai S, Okuda Y, Miyazaki S, Kawamori R, Shirayama M, Teramoto T. Dynamic prediction model and risk assessment chart for cardiovascular disease based on on-treatment blood pressure and baseline risk factors. Hypertens Res. 2016;39(2):113-118. doi:10.1038/hr.2015.120

133. Thao LTP, Wolbers M, Heemskerk AD, et al. Dynamic Prediction of Death in Patients With Tuberculous Meningitis Using Time-updated Glasgow Coma Scale and Plasma Sodium Measurements. Clin Infect Dis. 2020;70(5):827-834. doi:10.1093/cid/ciz262

134. Thomassen D, Amesz SF, Stol NP, le Cessie S, Steyerberg EW. Dynamic Prediction of Time to Wound Healing at Routine Wound Care Visits. Adv Wound Care (New Rochelle). 2025;14(4):188-198. doi:10.1089/wound.2024.0069

135. van der Leeuw MS, Messelink MA, Tekstra J, et al. Using real-world data to dynamically predict flares during tapering of biological DMARDs in rheumatoid arthritis: development, validation, and potential impact of prediction-aided decisions. Arthritis Res Ther. 2022;24(1):74. doi:10.1186/s13075-022-02751-8

136. van der Schroeff MP, Steyerberg EW, Wieringa MH, Langeveld TPM, Molenaar J, Baatenburg de Jong RJ. Prognosis: a variable parameter: dynamic prognostic modeling in head and neck squamous cell carcinoma. Head Neck. 2012;34(1):34-41. doi:10.1002/hed.21693

137. van Eekelen R, McLernon DJ, van Wely M, et al. External validation of a dynamic prediction model for repeated predictions of natural conception over time. Hum Reprod. 2018;33(12):2268-2275. doi:10.1093/humrep/dey317

138. van Eekelen R, Putter H, McLernon DJ, Eijkemans MJ, van Geloven N. A comparison of the beta-geometric model with landmarking for dynamic prediction of time to pregnancy. Biom J. 2020;62(1):175-190. doi:10.1002/bimj.201900155

139. Virdee PS, Patnick J, Watkinson P, Holt T, Birks J. Full Blood Count Trends for Colorectal Cancer Detection in Primary Care: Development and Validation of a Dynamic Prediction Model. Cancers (Basel). 2022;14(19). doi:10.3390/cancers14194779

140. von Cube M, Schumacher M, Putter H, Timsit JF, van de Velde C, Wolkewitz M. The population-attributable fraction for time-dependent exposures using dynamic prediction and landmarking. Biom J. 2020;62(3):583-597. doi:10.1002/bimj.201800252

141. Wang J, Luo S, Li L. DYNAMIC PREDICTION FOR MULTIPLE REPEATED MEASURES AND EVENT TIME DATA: AN APPLICATION TO PARKINSON’S DISEASE. Ann Appl Stat. 2017;11(3):1787-1809. doi:10.1214/17-AOAS1059

142. Wang S, Li Z, Lan L, Zhao J, Zheng WJ, Li L. GPU Accelerated Estimation of a Shared Random Effect Joint Model for Dynamic Prediction. Comput Stat Data Anal. 2022;174:107528. doi:10.1016/j.csda.2022.107528

143. Wang X, Kerrigan K, Puri S, Shen J, Akerley W, Haaland B. Dynamic Prediction of Near-Term Overall Survival in Patients with Advanced NSCLC Based on Real-World Data. Cancers (Basel). 2022;14(3). doi:10.3390/cancers14030690

144. Welten M, Wijga AH, Hamoen M, et al. Dynamic prediction model to identify young children at high risk of future overweight: Development and internal validation in a cohort study. Pediatr Obes. 2020;15(9):e12647. doi:10.1111/ijpo.12647

145. Wijnands AM, Penning de Vries BBL, Lutgens MWMD, et al. Dynamic Prediction of Advanced Colorectal Neoplasia in Inflammatory Bowel Disease. Clin Gastroenterol Hepatol. 2024;22(8):1697-1708. doi:10.1016/j.cgh.2024.02.014

146. Wu C, Li L, Li R. Dynamic prediction of competing risk events using landmark sub-distribution hazard model with multiple longitudinal biomarkers. Stat Methods Med Res. 2020;29(11):3179-3191. doi:10.1177/0962280220921553

147. Xie C, Huang X, Li R, Tsodikov A, Bhalla K. INDIVIDUAL DYNAMIC PREDICTION FOR CURE AND SURVIVAL BASED ON LONGITUDINAL BIOMARKERS. Ann Appl Stat. 2024;18(4):2796-2817. doi:10.1214/24-aoas1906

148. Yan YD, Yu Z, Ding LP, et al. Machine Learning to Dynamically Predict In-Hospital Venous Thromboembolism After Inguinal Hernia Surgery: Results From the CHAT-1 Study. Clin Appl Thromb Hemost. 2023;29:10760296231171082. doi:10.1177/10760296231171082

149. Yang M, Luo S, DeSantis S. Bayesian quantile regression joint models: Inference and dynamic predictions. Stat Methods Med Res. 2019;28(8):2524-2537. doi:10.1177/0962280218784757

150. Yang T, Yang Y, Jia Y, Li X. Dynamic prediction of hospital admission with medical claim data. BMC Med Inform Decis Mak. 2019;19(Suppl 1):18. doi:10.1186/s12911-019-0734-y

151. Yang Z, Hou Y, Lyu J, Liu D, Chen Z. Dynamic prediction and prognostic analysis of patients with cervical cancer: a landmarking analysis approach. Ann Epidemiol. 2020;44:45-51. doi:10.1016/j.annepidem.2020.01.009

152. Yang Z, Wu H, Hou Y, Yuan H, Chen Z. Dynamic prediction and analysis based on restricted mean survival time in survival analysis with nonproportional hazards. Comput Methods Programs Biomed. 2021;207:106155. doi:10.1016/j.cmpb.2021.106155

153. Ye Q, Wang X, Xu X, et al. Serial platelet count as a dynamic prediction marker of hospital mortality among septic patients. Burns Trauma. 2024;12:tkae016. doi:10.1093/burnst/tkae016

154. Yokota I, Matsuyama Y. Dynamic prediction of repeated events data based on landmarking model: application to colorectal liver metastases data. BMC Med Res Methodol. 2019;19(1):31. doi:10.1186/s12874-019-0677-0

155. Yu Z, Zhang Y, Cao Y, et al. A dynamic prediction model for prognosis of acute-on-chronic liver failure based on the trend of clinical indicators. Sci Rep. 2021;11(1):1810. doi:10.1038/s41598-021-81431-0

156. Yuan M, Lian S, Li X, Long X, Fang Y. Blood biomarkers in dynamic prediction of conversion to Alzheimer’s disease: An application of joint modeling. Int J Geriatr Psychiatry. 2024;39(3):e6079. doi:10.1002/gps.6079

157. Yuen HP, Mackinnon A, Hartmann J, et al. Dynamic prediction of transition to psychosis using joint modelling. Schizophr Res. 2018;202:333-340. doi:10.1016/j.schres.2018.07.002

158. Yuen HP, Mackinnon A, Nelson B. Dynamic prediction systems of transition to psychosis using joint modelling: extensions to the base system. Schizophr Res. 2020;216:207-212. doi:10.1016/j.schres.2019.11.059

159. Zeng L, Zhang J, Chen W, Ding Y. tdCoxSNN: Time-dependent Cox survival neural network for continuous-time dynamic prediction. J R Stat Soc Ser C Appl Stat. 2025;74(1):187-203. doi:10.1093/jrsssc/qlae051

160. Zeng Z, Tang X, Liu Y, He Z, Gong X. Interpretable recurrent neural network models for dynamic prediction of the extubation failure risk in patients with invasive mechanical ventilation in the intensive care unit. BioData Min. 2022;15(1):21. doi:10.1186/s13040-022-00309-7

161. Zhang C, Chen S, Wang Y, et al. Developing novel dynamic prediction methods for survival time to analyze short-term and long-term progression of Alzheimer’s disease. Artif Intell Med. 2025;165:103140. doi:10.1016/j.artmed.2025.103140

162. Zhang T, Tang X, Zhang Y, et al. Multivariate joint models for the dynamic prediction of psychosis in individuals with clinical high risk. Asian J Psychiatr. 2023;81:103468. doi:10.1016/j.ajp.2023.103468

163. Zhao H, Cao Y, Wang Y, et al. Dynamic prognostic model for kidney renal clear cell carcinoma (KIRC) patients by combining clinical and genetic information. Sci Rep. 2018;8(1):17613. doi:10.1038/s41598-018-35981-5

164. Zhao QY, Liu LP, Luo JC, et al. A Machine-Learning Approach for Dynamic Prediction of Sepsis-Induced Coagulopathy in Critically Ill Patients With Sepsis. Front Med (Lausanne). 2020;7:637434. doi:10.3389/fmed.2020.637434

165. Zhao X, Li J, Xie X, et al. Online interpretable dynamic prediction models for postoperative delirium after cardiac surgery under cardiopulmonary bypass developed based on machine learning algorithms: A retrospective cohort study. J Psychosom Res. 2024;176:111553. doi:10.1016/j.jpsychores.2023.111553

166. Zhou Y, Lao J, Cao Y, Wang Q, Wang Q, Tang F. Dynamic prediction of lung cancer suicide risk based on meteorological factors and clinical characteristics：A landmarking analysis approach. Soc Sci Med. 2024;357:117201. doi:10.1016/j.socscimed.2024.117201

167. Zhu GL, Fang XL, Yang KB, Tang LL, Ma J. Development and validation of a joint model for dynamic prediction of overall survival in nasopharyngeal carcinoma based on longitudinal post-treatment plasma cell-free Epstein-Barr virus DNA load. Oral Oncol. 2022;134:106140. doi:10.1016/j.oraloncology.2022.106140

168. Zhu Y, Huang X, Li L. Dynamic prediction of time to a clinical event with sparse and irregularly measured longitudinal biomarkers. Biom J. 2020;62(6):1371-1393. doi:10.1002/bimj.201900112

169. Zhu Y, Li L, Huang X. Landmark Linear Transformation Model for Dynamic Prediction with Application to a Longitudinal Cohort Study of Chronic Disease. J R Stat Soc Ser C Appl Stat. 2019;68(3):771-791. doi:10.1111/rssc.12334

170. Zou H, Li K, Zeng D, Luo S. Bayesian inference and dynamic prediction of multivariate joint model with functional data: An application to Alzheimer’s disease. Stat Med. 2021;40(30):6855-6872. doi:10.1002/sim.9214

171. Zou H, Zeng D, Xiao L, Luo S. BAYESIAN INFERENCE AND DYNAMIC PREDICTION FOR MULTIVARIATE LONGITUDINAL AND SURVIVAL DATA. Ann Appl Stat. 2023;17(3):2574-2595. doi:10.1214/23-aoas1733

**Table S1.** PRISMA 2020 checklist

| **Section and Topic** | **Item #** | **Checklist item** | **Location where item is reported** |
| --- | --- | --- | --- |
| **TITLE** | | |  |
| Title | 1 | Identify the report as a systematic review. | P1 |
| **ABSTRACT** | | |  |
| Abstract | 2 | See the PRISMA 2020 for Abstracts checklist. | P3 |
| **INTRODUCTION** | | |  |
| Rationale | 3 | Describe the rationale for the review in the context of existing knowledge. | P5-6 |
| Objectives | 4 | Provide an explicit statement of the objective(s) or question(s) the review addresses. | P6 |
| **METHODS** | | |  |
| Eligibility criteria | 5 | Specify the inclusion and exclusion criteria for the review and how studies were grouped for the syntheses. | P11-12 |
| Information sources | 6 | Specify all databases, registers, websites, organisations, reference lists and other sources searched or consulted to identify studies. Specify the date when each source was last searched or consulted. | P11 |
| Search strategy | 7 | Present the full search strategies for all databases, registers and websites, including any filters and limits used. | P11  Appendix 1 |
| Selection process | 8 | Specify the methods used to decide whether a study met the inclusion criteria of the review, including how many reviewers screened each record and each report retrieved, whether they worked independently, and if applicable, details of automation tools used in the process. | P12 |
| Data collection process | 9 | Specify the methods used to collect data from reports, including how many reviewers collected data from each report, whether they worked independently, any processes for obtaining or confirming data from study investigators, and if applicable, details of automation tools used in the process. | P12-13 |
| Data items | 10a | List and define all outcomes for which data were sought. Specify whether all results that were compatible with each outcome domain in each study were sought (e.g. for all measures, time points, analyses), and if not, the methods used to decide which results to collect. | P12-13 |
| 10b | List and define all other variables for which data were sought (e.g. participant and intervention characteristics, funding sources). Describe any assumptions made about any missing or unclear information. | P12-13 |
| Study risk of bias assessment | 11 | Specify the methods used to assess risk of bias in the included studies, including details of the tool(s) used, how many reviewers assessed each study and whether they worked independently, and if applicable, details of automation tools used in the process. | P23 |
| Effect measures | 12 | Specify for each outcome the effect measure(s) (e.g. risk ratio, mean difference) used in the synthesis or presentation of results. | P12-13 |
| Synthesis methods | 13a | Describe the processes used to decide which studies were eligible for each synthesis (e.g. tabulating the study intervention characteristics and comparing against the planned groups for each synthesis (item #5)). | NA |
| 13b | Describe any methods required to prepare the data for presentation or synthesis, such as handling of missing summary statistics, or data conversions. | NA |
| 13c | Describe any methods used to tabulate or visually display results of individual studies and syntheses. | NA |
| 13d | Describe any methods used to synthesize results and provide a rationale for the choice(s). If meta-analysis was performed, describe the model(s), method(s) to identify the presence and extent of statistical heterogeneity, and software package(s) used. | NA |
| 13e | Describe any methods used to explore possible causes of heterogeneity among study results (e.g. subgroup analysis, meta-regression). | NA |
| 13f | Describe any sensitivity analyses conducted to assess robustness of the synthesized results. | NA |
| Reporting bias assessment | 14 | Describe any methods used to assess risk of bias due to missing results in a synthesis (arising from reporting biases). | NA |
| Certainty assessment | 15 | Describe any methods used to assess certainty (or confidence) in the body of evidence for an outcome. | NA |
| **RESULTS** | | |  |
| Study selection | 16a | Describe the results of the search and selection process, from the number of records identified in the search to the number of studies included in the review, ideally using a flow diagram. | P13-15  Figure 1 |
| 16b | Cite studies that might appear to meet the inclusion criteria, but which were excluded, and explain why they were excluded. | P13-15  Figure 1 |
| Study characteristics | 17 | Cite each included study and present its characteristics. | Table 1  Appendix 2 |
| Risk of bias in studies | 18 | Present assessments of risk of bias for each included study. | NA |
| Results of individual studies | 19 | For all outcomes, present, for each study: (a) summary statistics for each group (where appropriate) and (b) an effect estimate and its precision (e.g. confidence/credible interval), ideally using structured tables or plots. | NA |
| Results of syntheses | 20a | For each synthesis, briefly summarise the characteristics and risk of bias among contributing studies. | NA |
| 20b | Present results of all statistical syntheses conducted. If meta-analysis was done, present for each the summary estimate and its precision (e.g. confidence/credible interval) and measures of statistical heterogeneity. If comparing groups, describe the direction of the effect. | NA |
| 20c | Present results of all investigations of possible causes of heterogeneity among study results. | NA |
| 20d | Present results of all sensitivity analyses conducted to assess the robustness of the synthesized results. | NA |
| Reporting biases | 21 | Present assessments of risk of bias due to missing results (arising from reporting biases) for each synthesis assessed. | NA |
| Certainty of evidence | 22 | Present assessments of certainty (or confidence) in the body of evidence for each outcome assessed. | NA |
| **DISCUSSION** | | |  |
| Discussion | 23a | Provide a general interpretation of the results in the context of other evidence. | P19-20 |
| 23b | Discuss any limitations of the evidence included in the review. | NA |
| 23c | Discuss any limitations of the review processes used. | NA |
| 23d | Discuss implications of the results for practice, policy, and future research. | P24-25 |
| **OTHER INFORMATION** | | |  |
| Registration and protocol | 24a | Provide registration information for the review, including register name and registration number, or state that the review was not registered. | Not registered |
| 24b | Indicate where the review protocol can be accessed, or state that a protocol was not prepared. | Not prepared |
| 24c | Describe and explain any amendments to information provided at registration or in the protocol. | NA |
| Support | 25 | Describe sources of financial or non-financial support for the review, and the role of the funders or sponsors in the review. | P27 |
| Competing interests | 26 | Declare any competing interests of review authors. | P27 |
| Availability of data, code and other materials | 27 | Report which of the following are publicly available and where they can be found: template data collection forms; data extracted from included studies; data used for all analyses; analytic code; any other materials used in the review. | P26 |

*From:*  Page MJ, McKenzie JE, Bossuyt PM, Boutron I, Hoffmann TC, Mulrow CD, et al. The PRISMA 2020 statement: an updated guideline for reporting systematic reviews. BMJ 2021;372:n71. doi: 10.1136/bmj.n71

For more information, visit: <http://www.prisma-statement.org/>

**Table S2.** Inter-rater reliability assessment based on the proportion of observed agreements and Cohen’s kappa for i) title and abstract screening, and ii) the exclusion of articles and classification of time horizons (final time horizon, sliding horizon window, unclear) for included articles.

| Pairs of reviewers | Title/Abstract screening | | Full-text articles assessed for eligibilitya | |
| --- | --- | --- | --- | --- |
| Proportion of observed agreements | Cohen’s kappa | Proportion of observed agreements | Cohen’s kappa |
| ED / LC | 99 % | 0.99 | 73 % | 0.61 |
| ED / SD | - | - | 70 % | 0.55 |
| ED / VB | - | - | 60 % | 0.40 |
| ED / PR | - | - | 60 % | 0.23 |
| SD / VB | - | - | 65 % | 0.53 |
| a Agreement for the exclusion of articles and classification of time horizons (*final time horizon, sliding horizon window, unclear*) for included articles | | | | |

**Figure S1.** Calibration plot of dynamic predictions obtained from the DIVAT internal validation sample (n=2,523, 66 observations deleted due to missing data concerning covariates) for landmark times from 1 to 6 years post-transplantation for a given 5-year *horizon window*. The black dots represent the means of the predicted risks and observed risks (Kaplan–Meier) for each subgroup, defined from quantiles of predictions. and are the estimated intercept and slope, respectively, obtained by linearly regressing the observed risks and the predicted risks quantiles (a perfect calibration corresponding to and ).


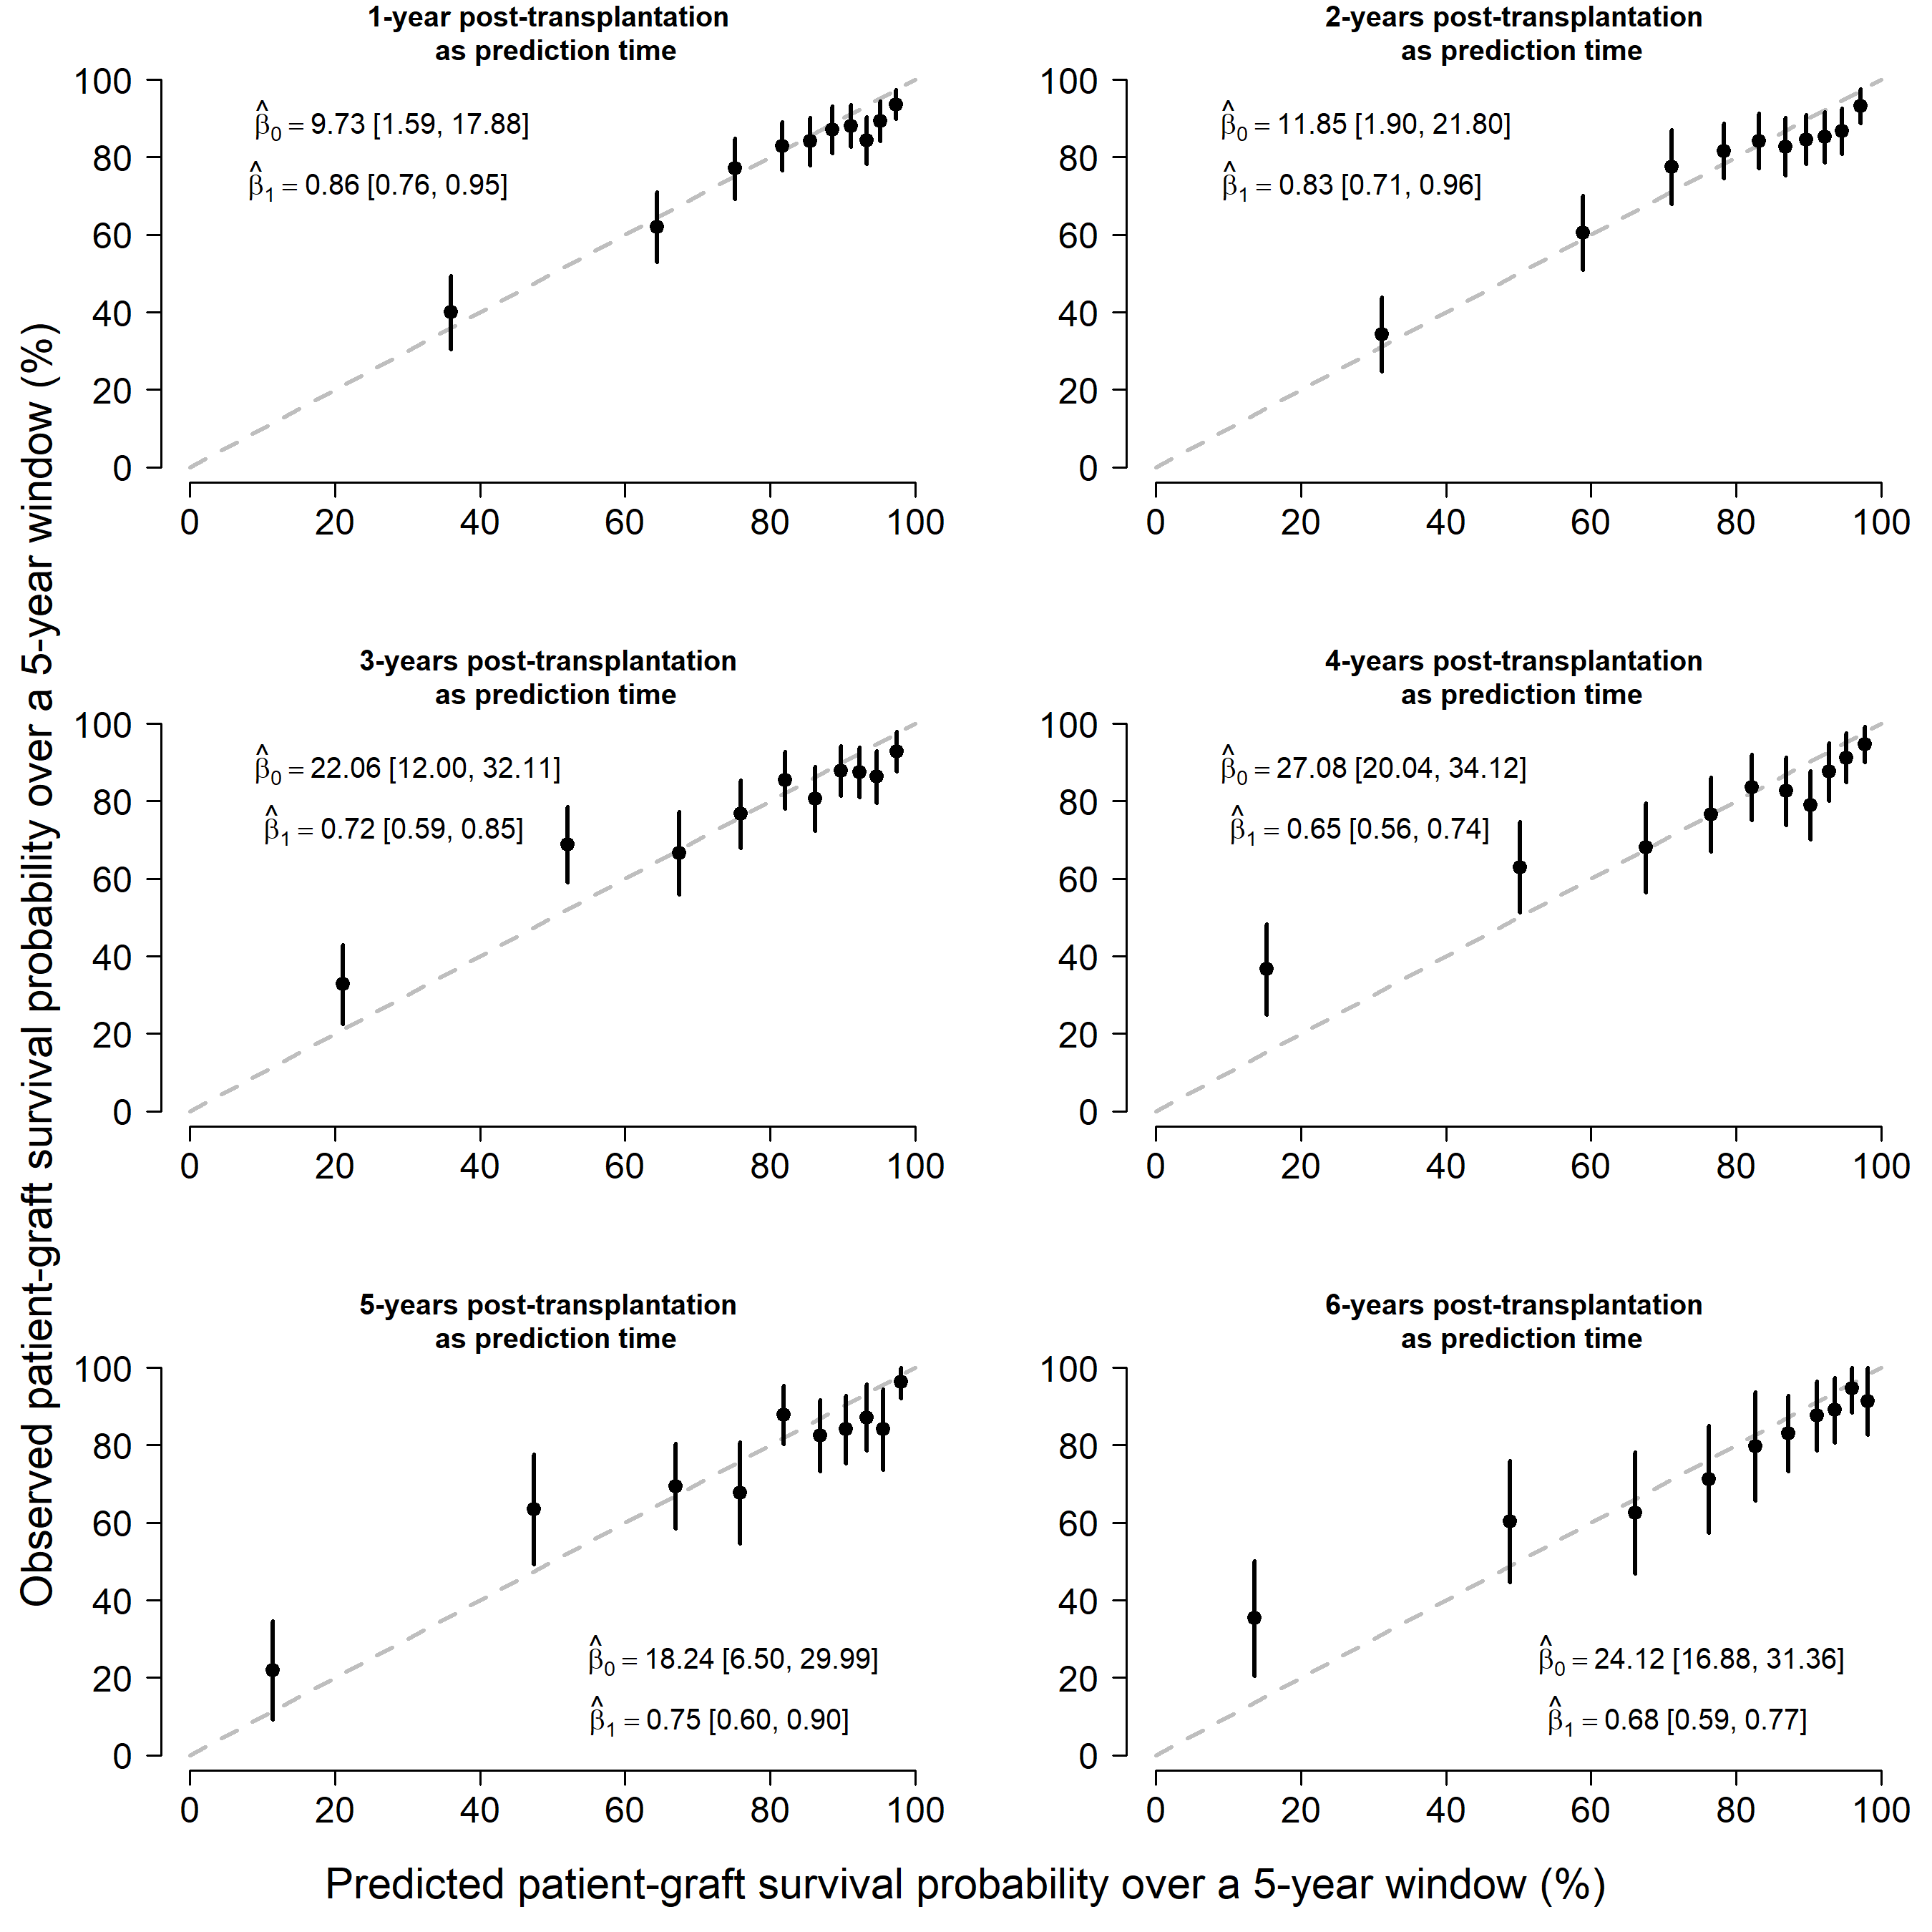


**Figure S2.** Calibration plot of dynamic predictions obtained from the DIVAT internal validation sample (n=2,523, 66 observations deleted due to missing data concerning covariates) for landmark times from 1 to 10 years post-transplantation for a *final time horizon* of 11 years post-transplantation. The black dots represent the means of the predicted risks and observed risks (Kaplan–Meier) for each subgroup, defined from quantiles of predictions. and are the estimated intercept and slope, respectively, obtained by linearly regressing the observed risks and the predicted risks quantiles (a perfect calibration corresponding to and ).


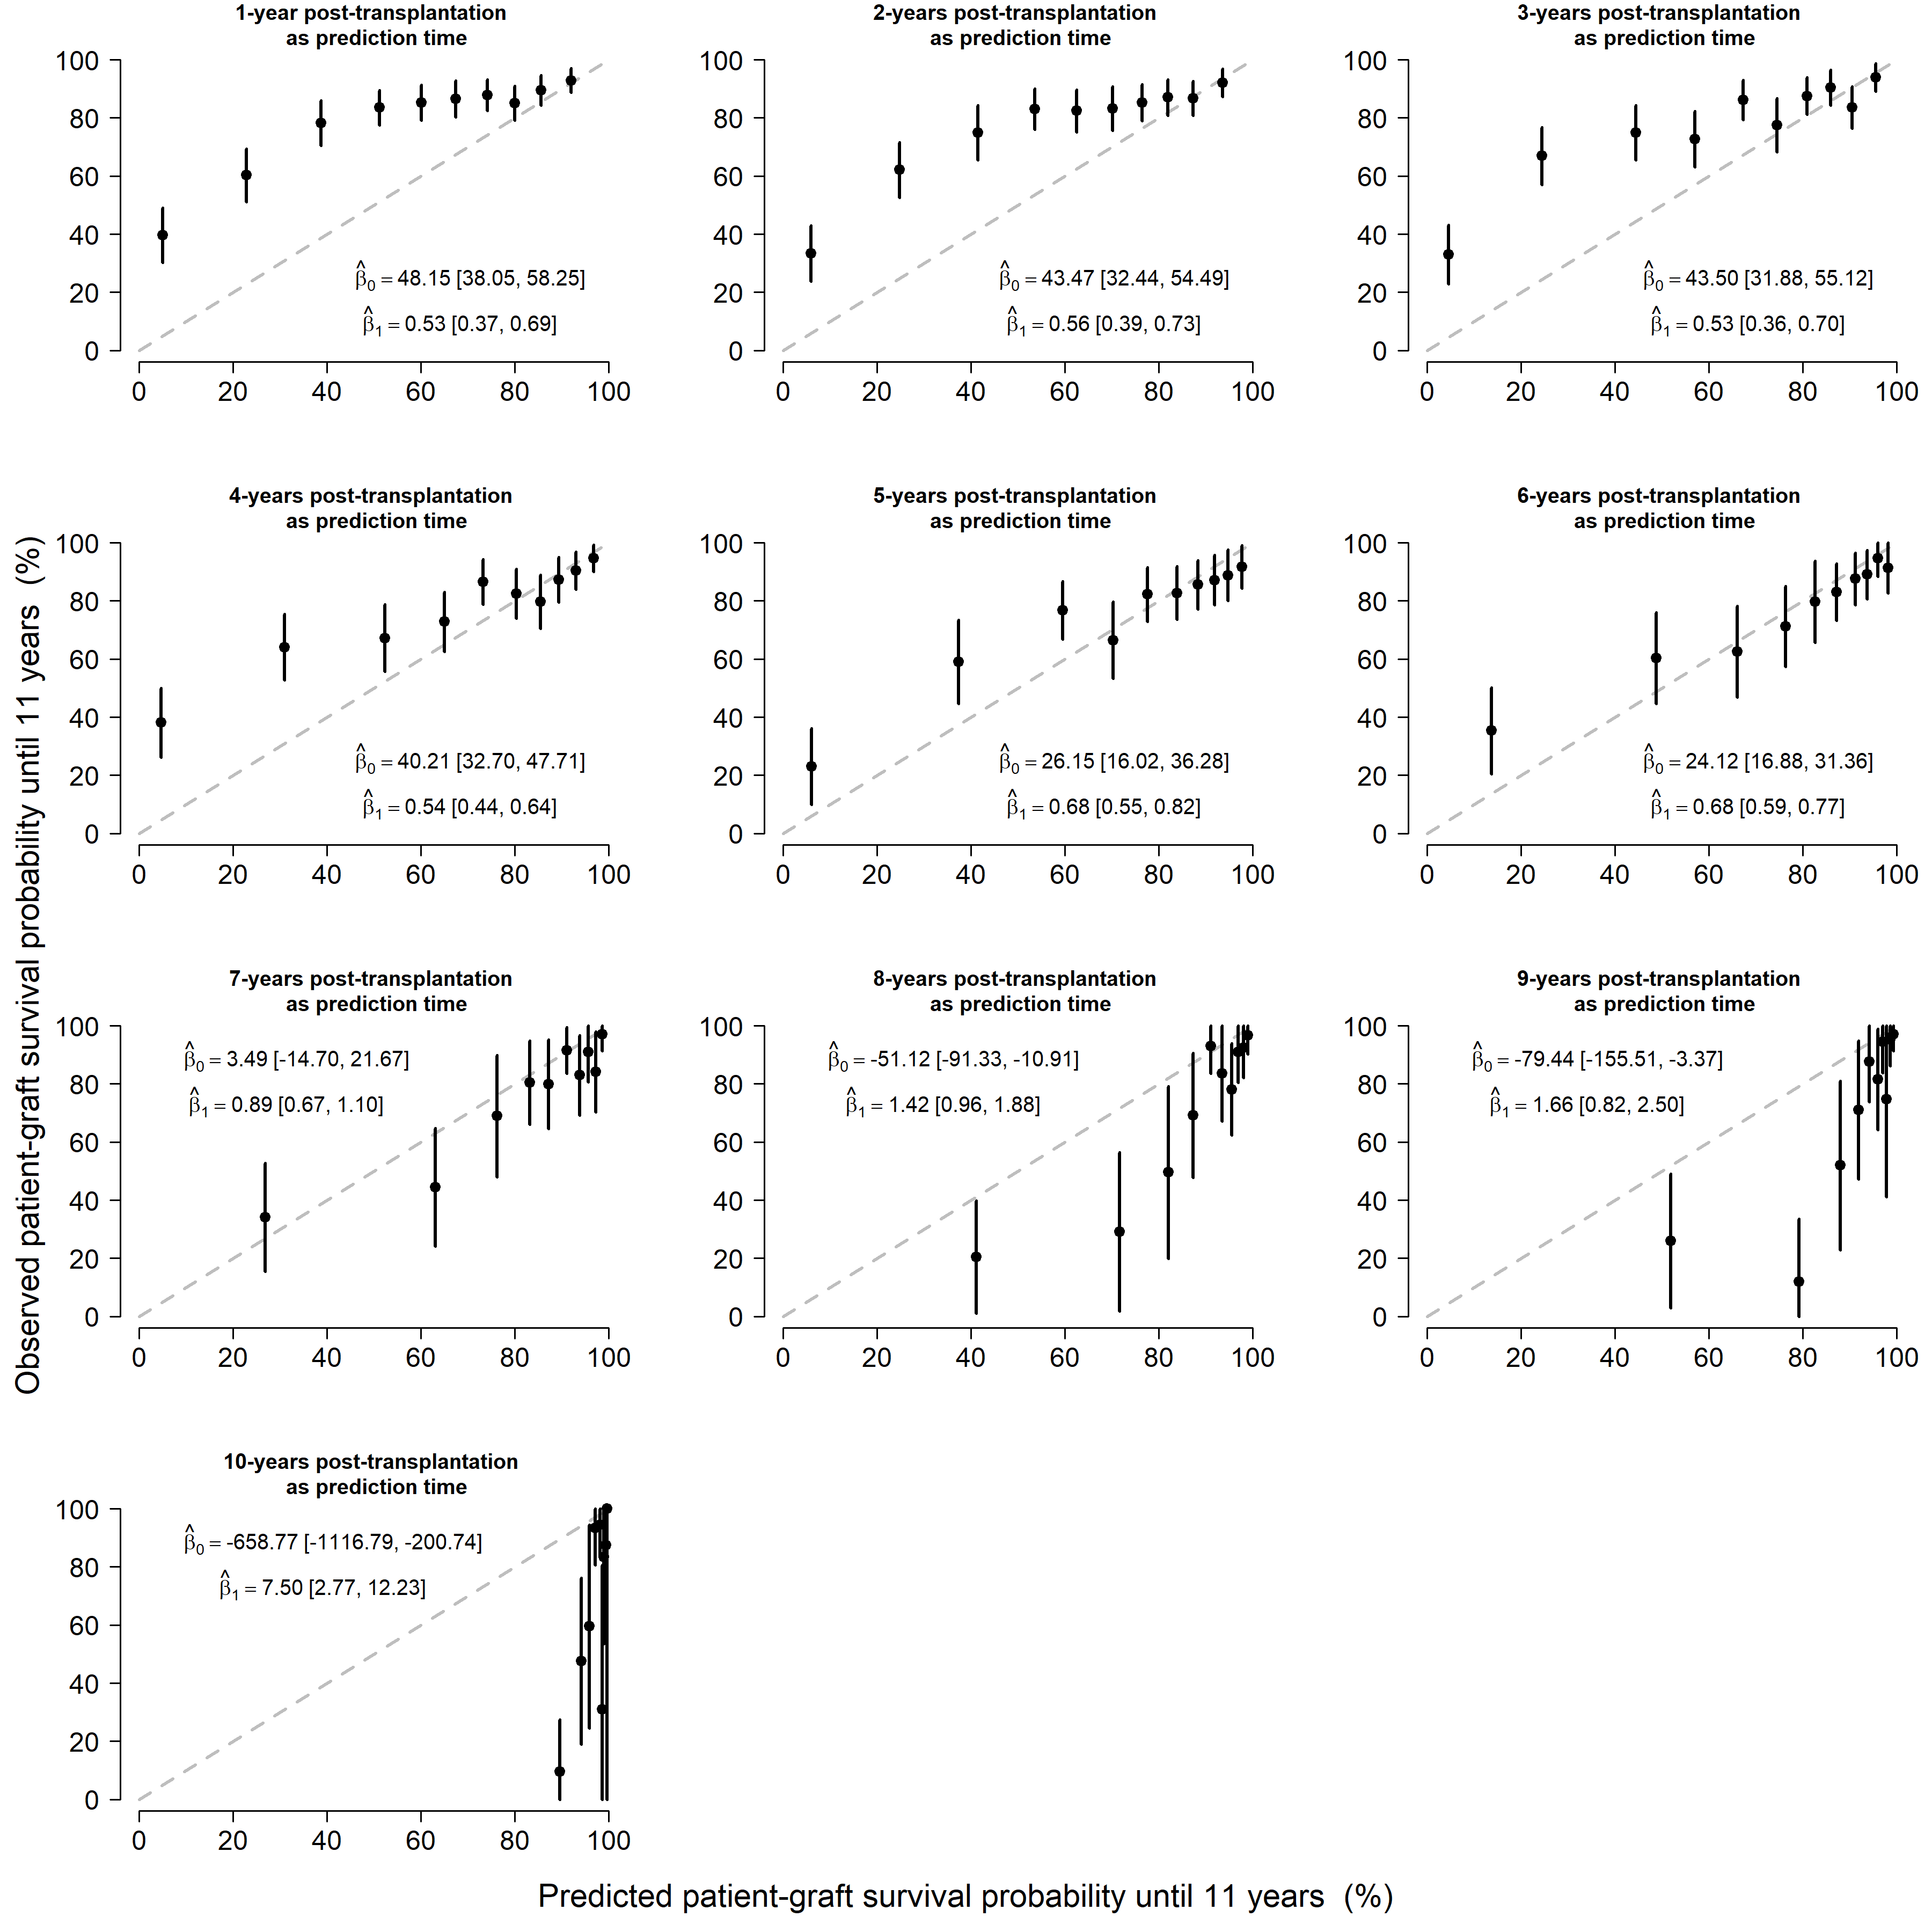


**Figure S3.** Distribution of the number of patients who experienced the event (return-to-dialysis, retransplantation or death with a functioning graft) in the 5-year *sliding* *horizon window*, who survived at the end of the 5-year *horizon window*, or were censored during the 5-year *horizon window.* Also shown are the incidence rates for 100 person-years in the 5-year *sliding horizon window* for landmark times ranging from 1 to 6 years post-transplantation obtained from the DIVAT internal validation sample (n = 2,523, 66 observations removed due to missing covariate data).


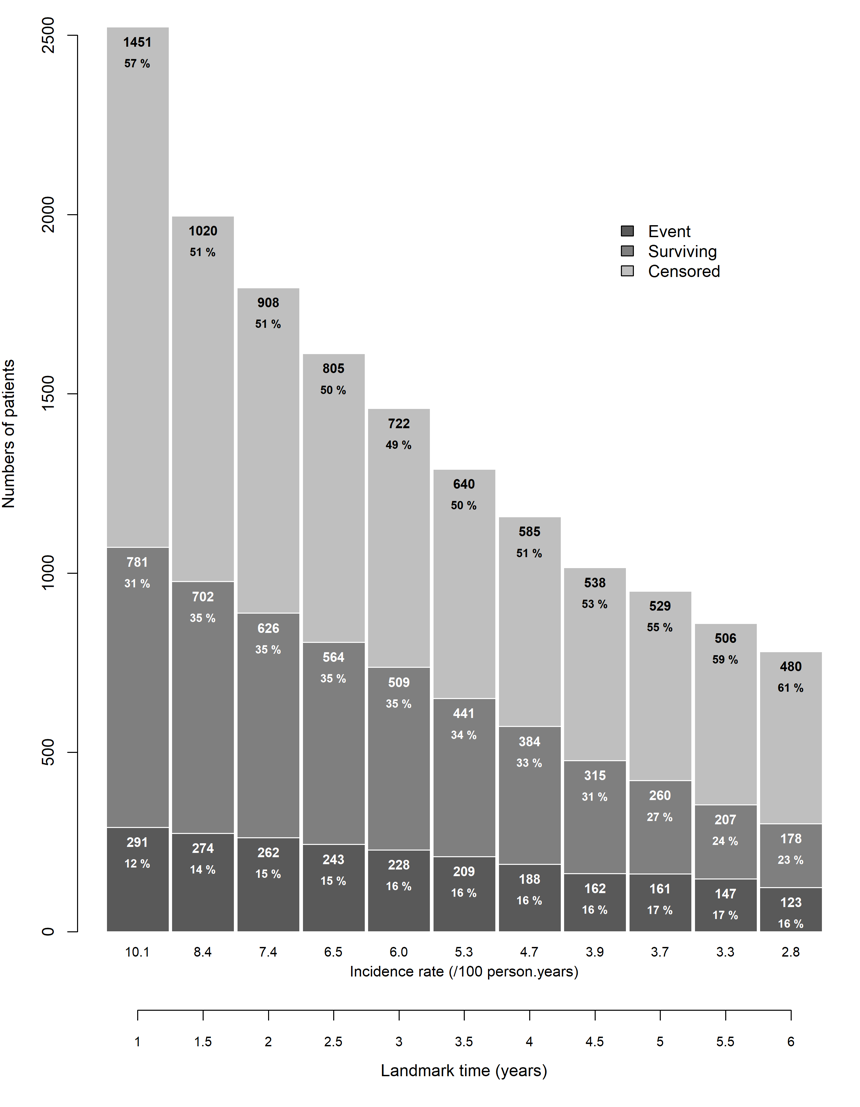


**Figure S4.** Distribution of the number of patients who experienced the event (return-to-dialysis, retransplantation or death with a functioning graft) before the *final time horizon* of 11 years, who survived at the *final time horizon* of 11-years, or were censored between the landmark times and the *final time horizon* of 11 years. Also shown are the incidence rates for 100 person-years until the *final time horizon* of 11 years, for landmark times ranging from 1 to 10 years post-transplantation obtained from the DIVAT internal validation sample (n = 2,523, 66 observations removed due to missing covariate data concerning covariates).


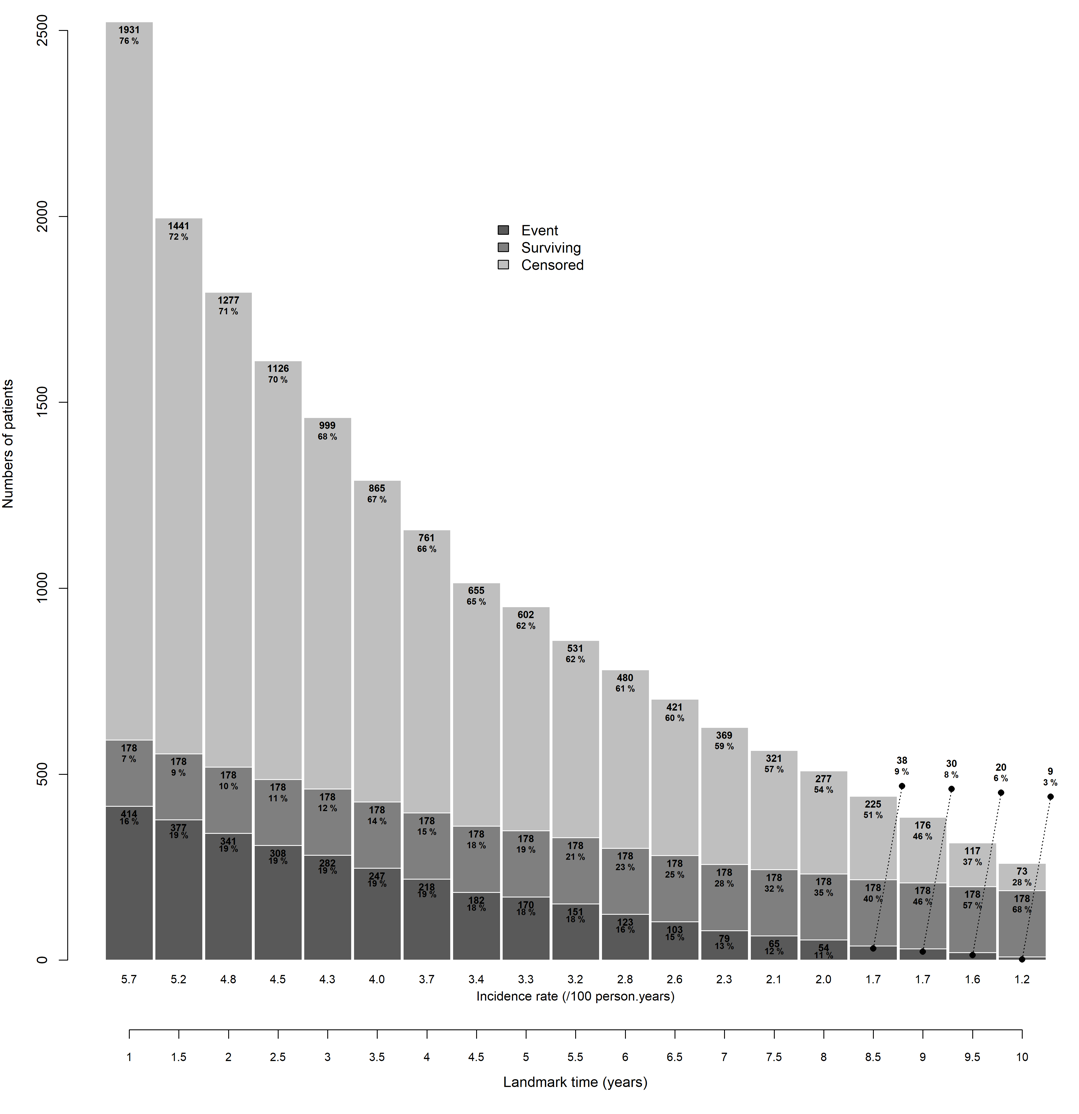

Supplement: Supplementary file 1 [file 572750%20Revised%20Supplementary%20Materials.docx]
